# Supplementary figures and images for: Comprehensive enzymatic analysis of the amylolytic system in the digestive fluid of the sea hare, Aplysia kurodai: Unique properties of two α-amylases and two α-glucosidases
Source: PubMed Central journal article supplement — FEBS Open Bio. 2014 Jun 18;4:560–70. doi: 10.1016/j.fob.2014.06.002 (PMC4141080; doi:10.1016/j.fob.2014.06.002), 2014-06-18

Figure S1

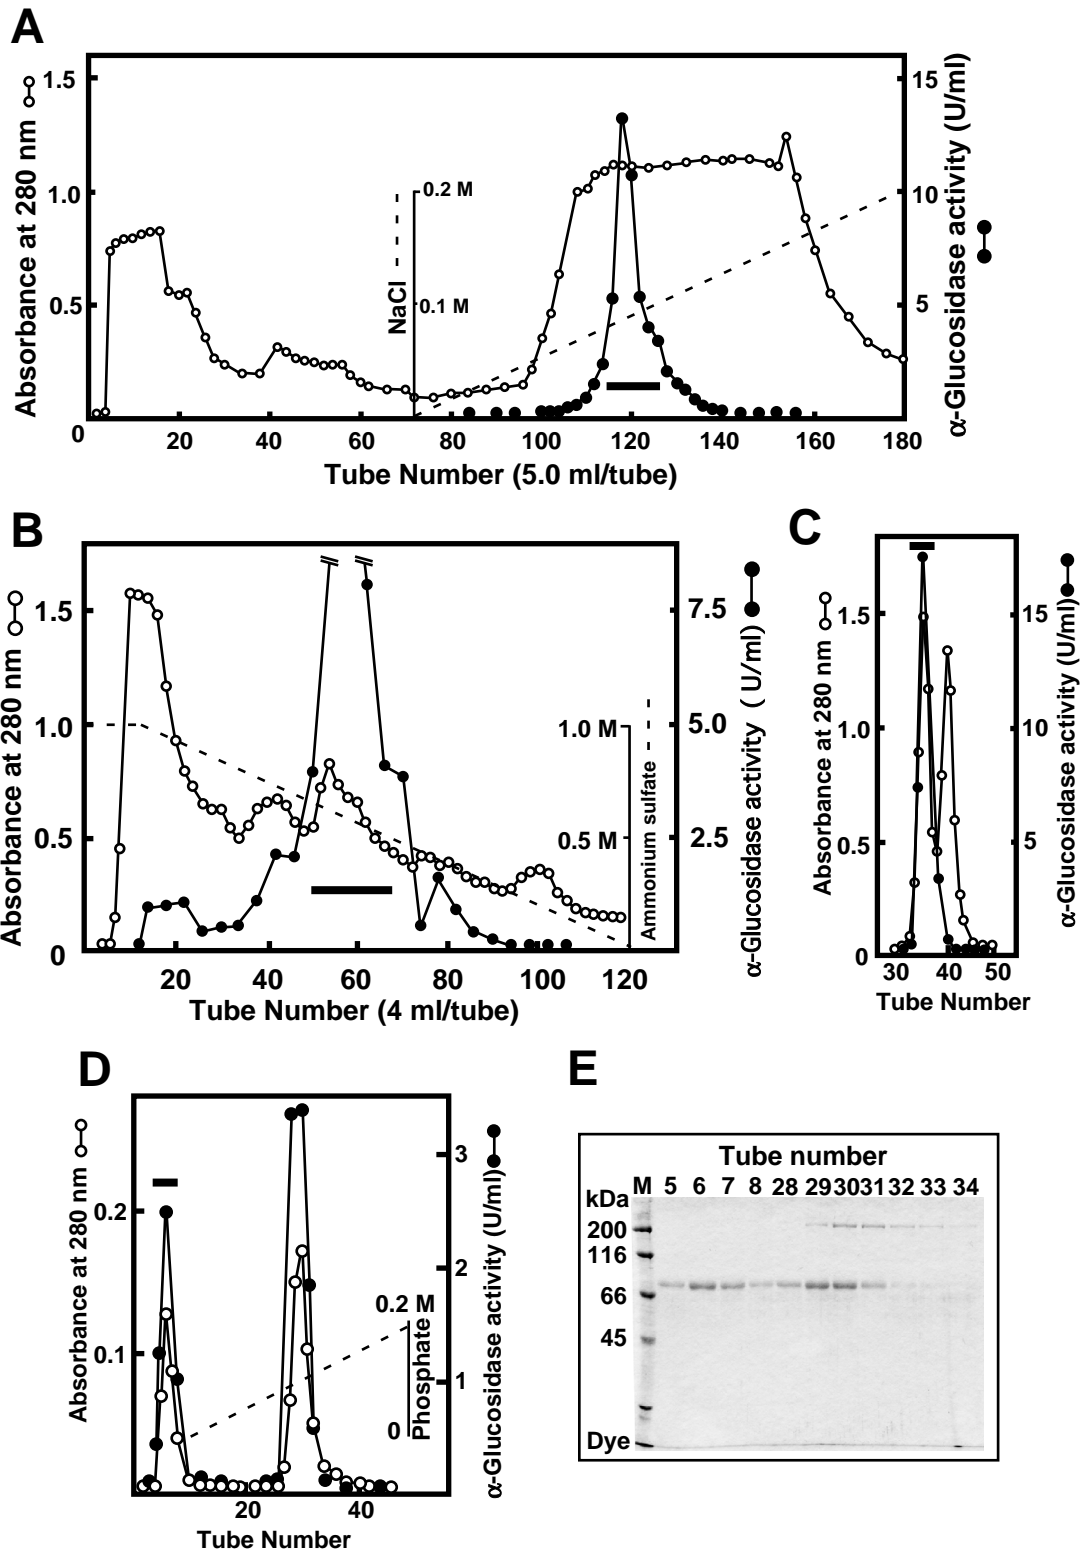

Supplement: mmc1.pdf [file mmc1.pdf]

Figure S2

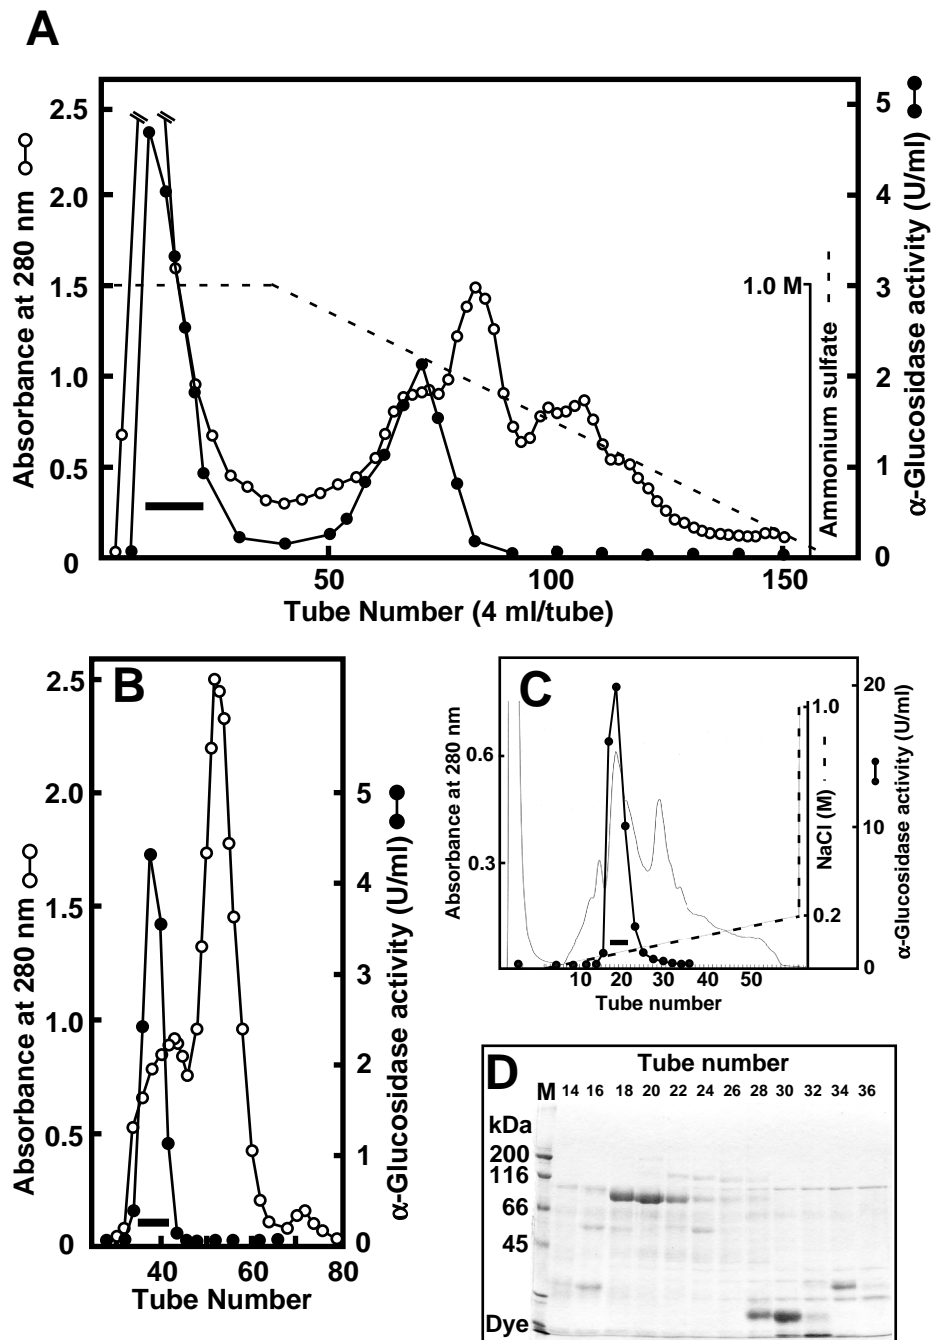

Supplement: mmc2.pdf [file mmc2.pdf]
